# Supplementary material for: Complete genome sequence of a multiple drug resistant Salmonella enterica serovar Typhi CT18
Source: Springer Nature journal article supplement (doi:10.1038/35101607), 2001-10-01
Supplement: 41586_2001_BF35101607_MOESM2_ESM.pdf [file 41586_2001_BF35101607_MOESM2_ESM.pdf]

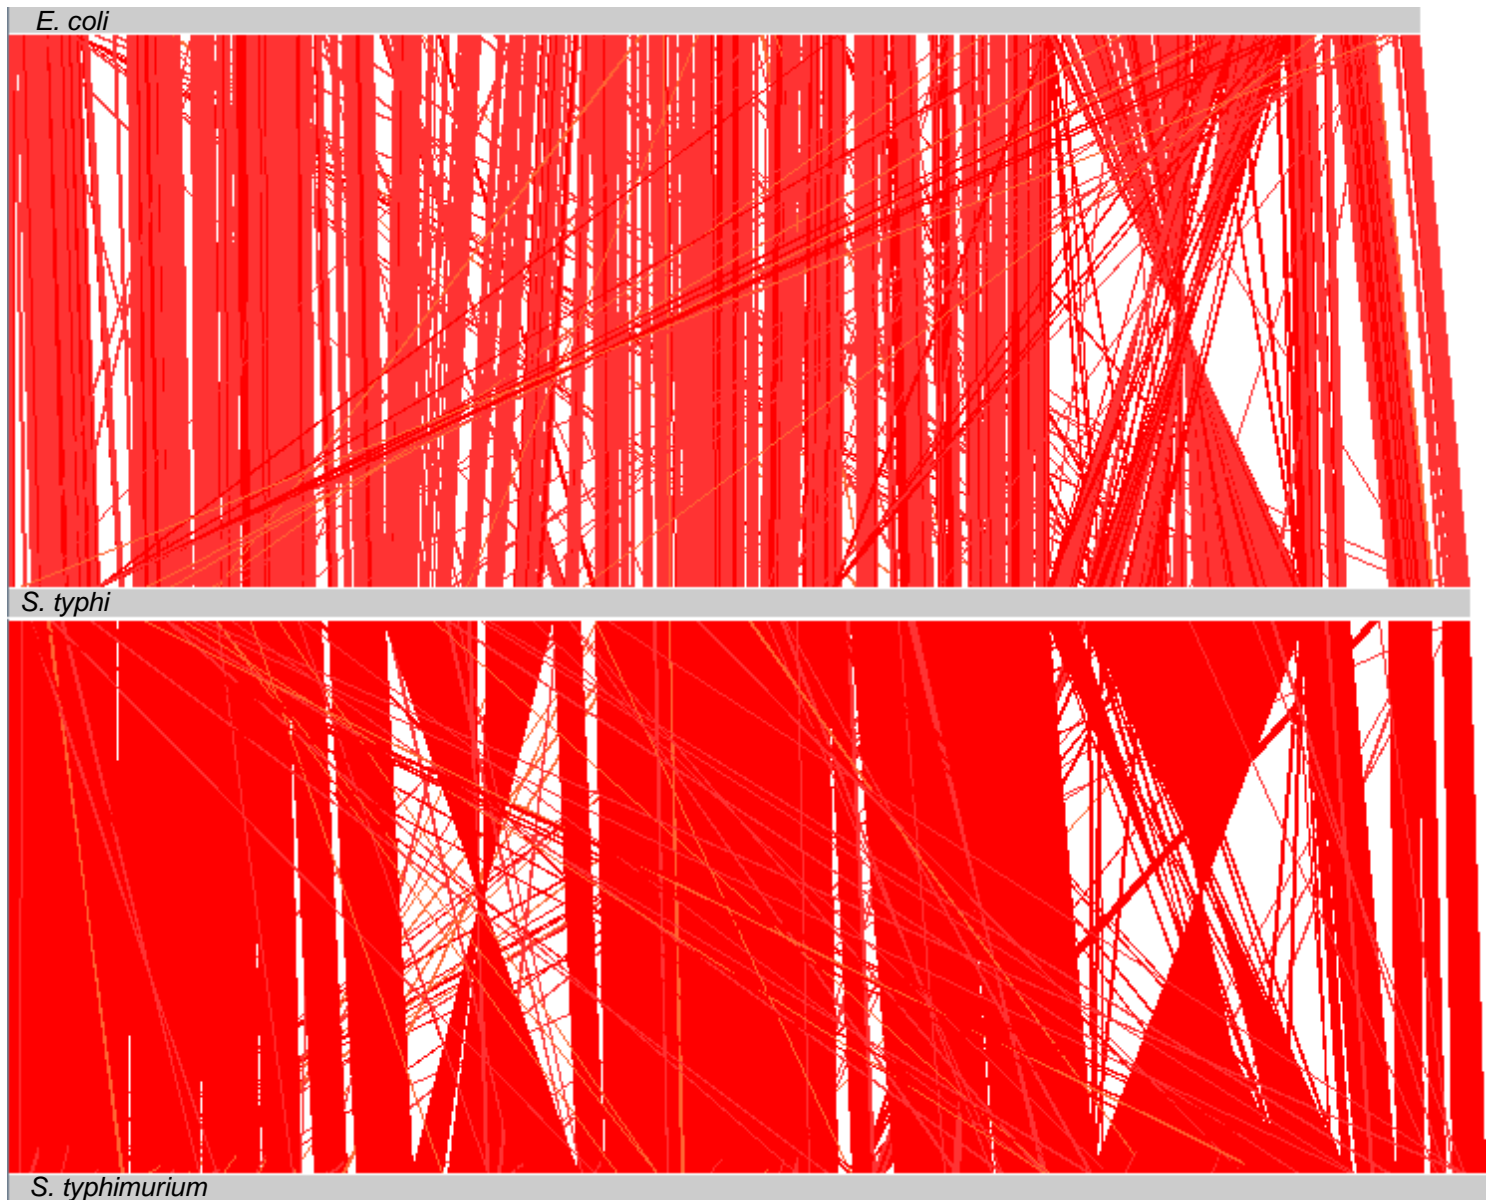

Legend: DNA/DNA matches (BLASTN) between each genome are shown as red bars with the colour intensity proportional to the degree of similarity.

This figure was drawn with ACT (<http://www.sanger.ac.uk/Software/ACT>) which will allow a fully interactive investigation of each pairwise similarity.
