# Supplementary figures and images for: Complete genome sequence of a multiple drug resistant Salmonella enterica serovar Typhi CT18
Source: Springer Nature journal article supplement (doi:10.1038/35101607), 2001-10-01

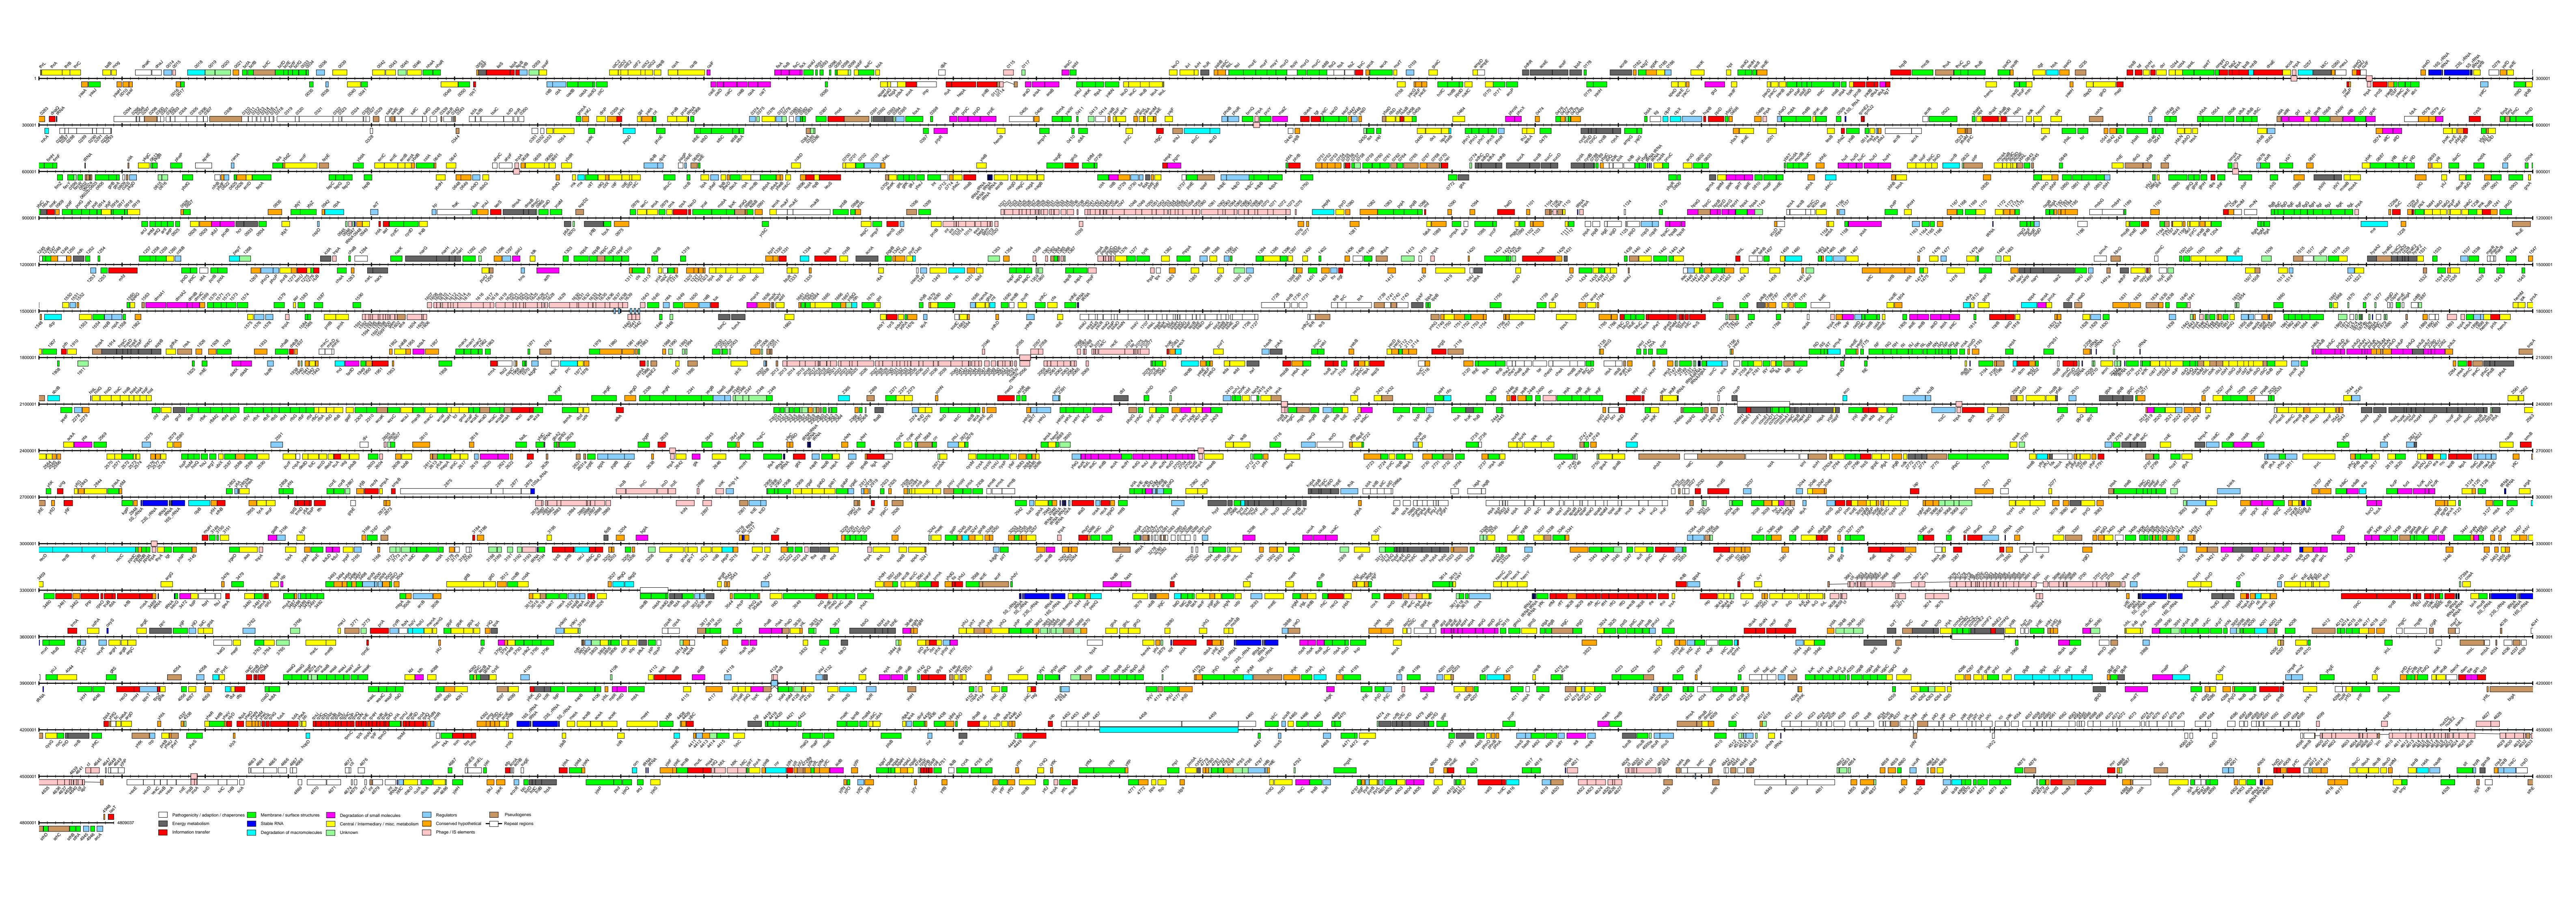

Supplement: 41586_2001_BF35101607_MOESM3_ESM.pdf [file 41586_2001_BF35101607_MOESM3_ESM.pdf]
